# Supplementary figures and images for: Identification of Immune-Based Biomarkers Associated With Response to Abatacept (CTLA4-Ig) in Rheumatoid Arthritis Patients
Source: Preprints.org preprint supplement (doi:10.20944/preprints202310.1896.v1), 2023-10-30

Figure S1

Sensitivity analysis of the composite index as a predictor of clinical responses


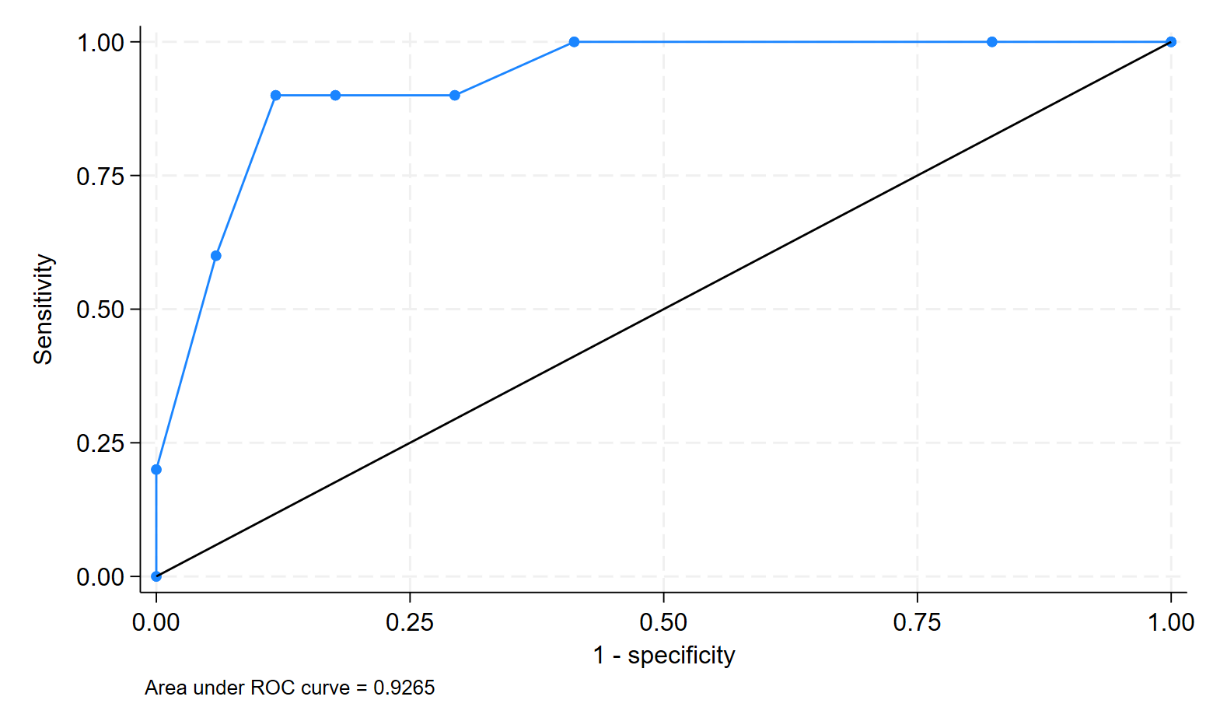

Supplement: Supplementary file 1 [file supplementary]
